# Supplementary material for: Serum lipid profile among sporadic and familial forms of Parkinson’s disease
Source: PubMed Central journal article supplement (PMC8285472; doi:10.1038/s41531-021-00206-6), 2021-07-16
Supplement: 41531_2021_206_MOESM1_ESM.pdf [file 41531_2021_206_MOESM1_ESM.pdf]

## SUPPLEMENTARY DATA

### Supplementary Data 1. Statistical Analysis Methods

We accomplished a Levene's test to study the homogeneity of variances of serum lipid variables (Total Cholesterol, HDL, LDL and triglycerides) in our population.

Depending on the results of the test, we chose the proper *post hoc* comparisons test and, if it was necessary, we added a Welch's test to the analysis of covariance (ANCOVA) already done. If there was homogeneity of variances (Levene's test  $p$  value  $> 0.05$ ), we applied Tukey test for multiple comparisons between groups. Instead, if homogeneity of variances should not be accepted (Levene's test  $p$  value  $< 0.05$ ), we applied Games-Howell test for multiple comparisons.

*Supplementary Table 1. Test for Equality of Variances (Levene's) in serum lipid variables*

|                          | <b>F</b> | <b>df1</b> | <b>df2</b> | <b>p</b> |
|--------------------------|----------|------------|------------|----------|
| <i>Total cholesterol</i> | 0.850    | 3          | 665        | 0.193    |
| <i>HDL</i>               | 1.130    | 3          | 529        | 0.336    |
| <i>LDL</i>               | 5.091    | 3          | 519        | 0.002*   |
| <i>Triglycerides</i>     | 2.375    | 3          | 660        | 0.069    |

\*  $p < 0.05$

We applied Welch's test to compare mean levels of serum lipids variables between groups when homogeneity of variances was not accepted (LDL).

*Supplementary Table 2. Welch's Test applied to compare mean levels of serum lipids variables between groups*

|                   | <b>F</b> | <b>df1</b> | <b>df2</b> | <b>p</b> |
|-------------------|----------|------------|------------|----------|
| Total Cholesterol | 5.902    | 3          | 63.039     | 0.001*   |
| HDL               | 1.029    | 3          | 52.265     | 0.388    |
| LDL               | 4.620    | 3          | 50.232     | 0.006*   |
| Triglycerides     | 2.199    | 3          | 64.098     | 0.097    |

\*  $p < 0.05$

Supplementary Table 3. Post Hoc Comparisons - Total Cholesterol

|        |          | Mean<br>Difference | 95% CI for Mean<br>Difference |       | SE     | t      | p <sub>tukey</sub> |
|--------|----------|--------------------|-------------------------------|-------|--------|--------|--------------------|
|        |          |                    | Lower                         | Upper |        |        |                    |
| HCs    | sPD      | 6.397              | -2.09                         | 14.89 | 3.296  | 1.940  | 0.212              |
|        | GBA-PD   | 23.935             | 2.22                          | 45.65 | 8.430  | 2.838  | 0.024**            |
|        | LRRK2-PD | -11.578            | -32.07                        | 8.91  | 7.957  | -1.226 | 0.465              |
| sPD    | GBA-PD   | 17.538             | -4.64                         | 39.72 | 8.613  | 2.035  | 0.176              |
|        | LRRK2-PD | -17.975            | -38.97                        | 3.02  | 8.150  | -1.993 | 0.123              |
| GBA-PD | LRRK2-PD | -35.513            | -64.50                        | -6.53 | 11.253 | -3.004 | 0.009**            |

Note. P-value and confidence intervals adjusted for comparing a family of 4 estimates (confidence intervals corrected using the tukey method). HCs: healthy controls. sPD: sporadic Parkinson's disease. GBA-PD: GBA-associated Parkinson's disease patients. LRRK2-PD: LRRK2-associated Parkinson's disease patients. \*\*\* p< 0.005 \*\* p< 0.05 \*p<0.1

Supplementary Table 4. Post Hoc Comparisons - HDL

|        |          | Mean<br>Difference | 95% CI for Mean<br>Difference |       | SE    | t      | p <sub>tukey</sub> |
|--------|----------|--------------------|-------------------------------|-------|-------|--------|--------------------|
|        |          |                    | Lower                         | Upper |       |        |                    |
| HCs    | sPD      | -2.083             | -6.36                         | 2.20  | 1.661 | -1.741 | 0.303              |
|        | GBA-PD   | -2.261             | -8.43                         | 12.95 | 4.147 | -0.175 | 0.948              |
|        | LRRK2-PD | 2.155              | -7.37                         | 11.68 | 3.695 | 1.211  | 0.937              |
| sPD    | GBA-PD   | 4.344              | -6.65                         | 15.34 | 4.267 | 0.514  | 0.739              |
|        | LRRK2-PD | 4.238              | -5.63                         | 14.11 | 3.829 | 1.932  | 0.686              |
| GBA-PD | LRRK2-PD | -0.106             | -14.01                        | 13.80 | 5.395 | 0.962  | 1.000              |

Note. P-value and confidence intervals adjusted for comparing a family of 4 estimates (confidence intervals corrected using the tukey method). HCs: healthy controls. sPD: sporadic Parkinson's disease. GBA-PD: GBA-associated Parkinson's disease patients. LRRK2-PD: LRRK2-associated Parkinson's disease patients. \*\*\* p< 0.005 \*\* p< 0.05 \*p<0.1

Supplementary Table 5. Games-Howell Post Hoc Comparisons - LDL

| Comparison     |                  | Mean Difference | 95% CI for Mean Difference |        | SE    | t     | p G-H    |
|----------------|------------------|-----------------|----------------------------|--------|-------|-------|----------|
|                |                  |                 | Lower                      | Upper  |       |       |          |
| HCs            | sPD              | 1.733           | -7.98                      | 11.45  | 3.754 | 0.462 | 0.967    |
|                | <i>GBA</i> -PD   | 21.708          | 1.35                       | 42.06  | 7.241 | 2.998 | 0.034**  |
|                | <i>LRRK2</i> -PD | -13.601         | -31.69                     | 4.49   | 6.581 | -1.62 | 0.191    |
| sPD            | <i>GBA</i> -PD   | 19.975          | -1.43                      | 41.40  | 7.790 | 2.564 | 0.074*   |
|                | <i>LRRK2</i> -PD | -15.334         | -34.687                    | 4.018  | 7.180 | -1.73 | 0.162    |
| <i>GBA</i> -PD | <i>LRRK2</i> -PD | -35.309         | -60.812                    | -9.806 | 9.482 | -3.39 | 0.003*** |

HCs: healthy controls. sPD: sporadic Parkinson's disease. *GBA*-PD: *GBA*-associated Parkinson's disease patients. *LRRK2*-PD: *LRRK2*-associated Parkinson's disease patients. \*\*\* p< 0.005 \*\* p< 0.05 \*p<0.1

Supplementary Table 6. Post Hoc Comparisons - Triglycerides

|                |                  | 95% CI for Mean Difference |         |        |        |        |                    |
|----------------|------------------|----------------------------|---------|--------|--------|--------|--------------------|
|                |                  | Mean Difference            | Lower   | Upper  | SE     | t      | p <sub>tukey</sub> |
| HCs            | sPD              | 13.563                     | 0.393   | 29.596 | 5.533  | 2.451  | 0.059*             |
|                | <i>GBA</i> -PD   | 10.199                     | -24.382 | 48.258 | 14.060 | 0.725  | 0.875              |
|                | <i>LRRK2</i> -PD | 5.398                      | -29.152 | 39.418 | 13.311 | 0.407  | 0.980              |
| sPD            | <i>GBA</i> -PD   | -3.364                     | -40.254 | 34.140 | 14.377 | -0.234 | 0.995              |
|                | <i>LRRK2</i> -PD | -8.165                     | -44.989 | 25.267 | 13.607 | -0.600 | 0.925              |
| <i>GBA</i> -PD | <i>LRRK2</i> -PD | -4.801                     | -55.400 | 41.791 | 18.768 | -0.256 | 0.994              |

Note. P-value and confidence intervals adjusted for comparing a family of 4 estimates (confidence intervals corrected using the tukey method). HCs: healthy controls. sPD: sporadic Parkinson's disease. *GBA*-PD: *GBA*-associated Parkinson's disease patients. *LRRK2*-PD: *LRRK2*-associated Parkinson's disease patients.

\*\*\*p<0.005 \*\*p< 0.05 \*p<0.1

## Supplementary Data 2.

Supplementary Table 7. Complete list of primers used in GBA screening

| Primer     | Sequences                   |
|------------|-----------------------------|
| Exon 1A F  | 5'-GGAAGGTTAGGAATCCTCTGAGC  |
| Exon 1A R  | 5'-GAAAAGCAGCCCTGGGGAGT     |
| Exon 1B f  | 5'-GCCTCTGCATGAGTGACCGT     |
| Exon 1B r  | 5'-TTAAGTGCGAACGCAGGGAG     |
| Exon 2 F   | 5'-CCGGAATTACTTGCAGGGCT     |
| Exon 2 R   | 5'-CCTGGATTCAAAGAGAGTCTGTCA |
| Exon 3 F2  | 5'-GTGGGCCTTGTCTAATGAA      |
| Exon 3 R2  | 5'-ACCACCTGCTTACTGGAAGG     |
| Exon 4 F   | 5'-GCAGATGTGTCCATTCTCCA     |
| Exon 4 R   | 5'-CACTGACACCATTACCTCTAGGA  |
| Exon 5 F   | 5'-TTCCCGCTGGGTACTGATAC     |
| Exon 5 R   | 5'-CGAAAAGTTTCAATGGCTCT     |
| Exon 6 F   | 5'-CAGGAGCCCAAGTTCCCTTT     |
| Exon 6 R   | 5'-CTACAGTTTCTCAACCCCCAGA   |
| Exon 7 F   | 5'-GTGGAGGCTAATGGCTGAAC     |
| Exon 7 R3  | 5'-ACAGATCAGCATGGCTAAAT     |
| Exon 8 F   | 5'-CACCCAGCTGGTCTGGTC       |
| Exon 8 R   | 5'-GCTCTAAGTTTGGGAGCCAGT    |
| Exon 9 F   | 5'-CTGTGTGCAAGGTCCAGGAT     |
| Exon 9 R   | 5'-AGGTCTGAGGTCTGCTTTGC     |
| Exon 10 F2 | 5'-CACAGCTGCCTCTCCACAT      |
| Exon 10 R4 | 5'-GTCACCTCCTGCCTCCATG      |
| Exon 11 F  | 5'-GTCCGTGGGTGGGTGACT       |
| Exon 11 R  | 5'-ACGCTGTCTTCAGCCCACT      |
| Exon 12 F2 | 5'-TGGCAGGATCACACTCAG       |
| Exon 12 R2 | 5'-TGCTGTGCCCTCTTTAGTCA     |

*Supplementary Table 8. Complete list of primers used in LRRK2 screening*

| <b>Primer</b> | <b>Sequences</b>            |
|---------------|-----------------------------|
| Exon 20 F2    | AATTGTTGATTTCTAAGTTGCTGGT   |
| Exon 20 R2    | TGGGTCCTATTGTTCAATGTCAGT    |
| Exon 21 F     | GATTTTACAAAGGGAATGGACTGTG   |
| Exon 21 R     | GTCAGCAGCAAAACACAACATAATC   |
| Exon 22 F     | TGTCCTCTTCTCCAATAAATGACAG   |
| Exon 22 R     | TGGAGGAAATTCAACCAAACAC      |
| Exon 23 F     | GCTAGGAGGTGCTCACTAAACTTT    |
| Exon 23R      | AAGCTCTTCAAATGTCTTGAAAGTT   |
| Exon 24 F     | GCTAGACTTAAGTTCCTCAGATGG    |
| Exon 24 R     | TCAGCATATTTAGGCAACCC        |
| Exon 25 F     | AATGAGTCCTCTTTGATGCTGTTC    |
| Exon 25 R     | AAGGGTCCATATATGACTCATCTTG   |
| Exon 26 F     | CACTATTGGTAGCTGTTCTTATTTTTG |
| Exon 26R      | AAGGTTCTGTTCCAGCTAATGTG     |
| Exon 27 F     | ACCCTGGGGAAAATTATTTGTG      |
| Exon 27 R     | GAAGCTTCTAGTTTCATGAAATTGG   |
| Exon 28 F     | CTTCCTCCCACCAACAGG          |
| Exon 28 R     | TGTCCATCAAAGTCACAGAGAG      |
| Exon 29 F     | CAAATACTAGGTTTCTTCAACAGCG   |
| Exon 29 R     | CATACAGTCTACCAGGTTTCTGGAT   |
| Exon 30 F     | GGATTCTTGCCTGTCGTTTG        |
| Exon 30 R     | CTCGGAAAGTTTCCCAATTCAA      |
| Exon 31 F     | AGCAGGCCCAGTTTGAAAG         |
| Exon 31 R     | GACATTTCTAGGCAGTTGAGAATC    |
| Exon 32 F     | TTAGCACTGAATTTGCCAACC       |
| Exon 32 R     | CCGTATGGATATTCTCTCAACTTTG   |
| Exon 33 F     | AAAGCCCCTTGATATTTGTTC       |
| Exon 33 R     | ATGCTTTGACCATAACCCCC        |
| Exon 34 F     | TCTTTCTGACTACTTTCCTGAGCA    |
| Exon 34 R     | TTCTTTACCTGCTTGGAACCAG      |
| Exon 35 F     | AGGTTGGGTGTTTTGTGAGG        |
| Exon 35 R     | ATGCCATCTCCCTAATTTCTC       |
| Exon 36 F     | GGAAGCAGTTAATAATTAATGGCTC   |
| Exon 36 R     | AAACATTCAAATTGTTTCCTTACC    |
| Exon 37 F     | CTTTGCGACAGTATGAGGTTTAGA    |
| Exon 37 R     | TGAAGGATCACTTAAAAGCATTGT    |
| Exon 38 F     | TTCACATCAAACCACAAATTTATG    |

|           |                             |
|-----------|-----------------------------|
| Exon 38 R | GCAAAACAAATTCCAGATCTGTAAT   |
| Exon 39 F | TCAATGAAACAAGTAGGTCAGGTTT   |
| Exon 39 R | CATTATTTTGCATTTTCACAACGT    |
| Exon 40 F | CCTGTTGATGCACTTTAAAGAAGG    |
| Exon 40 R | TGACCTACTTACCTCAAACCATCAG   |
| Exon 41 F | TTTTGATGCTTGACATAGTGGAC     |
| Exon 41 R | CACATCTGAGGTCAGTGGTTATC     |
| Exon 42 F | TATGAGCCCTGATGTTGGTC        |
| Exon 42 R | CAATTAATAAAAAATGAAGCTGCTG   |
| Exon 43 F | TTTTCTTTGCAATGTCTGGACC      |
| Exon 43 R | GGTGAAAATTATAGGAGGTTTGCC    |
| Exon 44 F | TTCAAGGGAAATGAGTTAACTCG     |
| Exon 44 R | TGAAAGATTTAAAGAGCATTGGA     |
| Exon 45 F | TTTTCTTTTCTTAACAGGAAGTTGC   |
| Exon 45 R | TGCTGATGCAATAACAATTATGC     |
| Exon 46 F | AAAGTGGAGGAGAACATTAAGGC     |
| Exon 46 R | AATCCCATAAGAGGGGTGTG        |
| Exon 47 F | TTTGAAAGCACAGATTTTATGGAG    |
| Exon 47 R | AAGATCTTCCTTATGAATTATCAACAG |
| Exon 48 F | ATATTCAATTCAGAATGGTTAGGGA   |
| Exon 48 R | CTGTGACACATGAAGTGCAAAGAT    |
| Exon 49 F | CTTTATGGTTCTAGGGAGGTAATGG   |
| Exon 49 R | GCACTGGAAAGTTCAGAGAAAATG    |
| Exon 50 F | TTCAGTTCCAAGGTATTTGTGTC     |
| Exon 50 R | TGTTACCATCATTACATCATTG      |
| Exon 51 F | TAAAATACATGAGCCAAACTGAAA    |
| Exon 51 R | TTCATACACACGAGCTATTTCAAAA   |
